# Supplementary material for: Proximity-Labeling Reveals Novel Host and Parasite Proteins at the Toxoplasma Parasitophorous Vacuole Membrane
Source: PubMed Central journal article supplement (PMC8576527; doi:10.1128/mbio.00260-21), 2021-11-09

**A**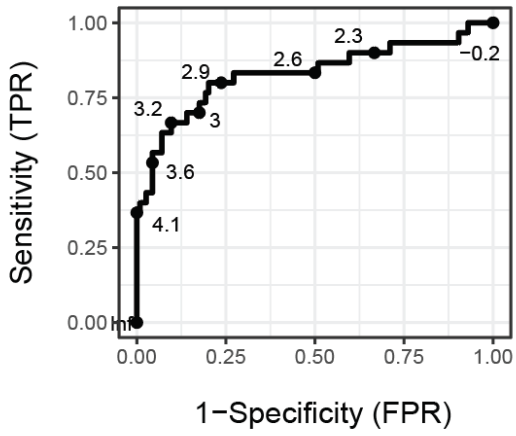**B**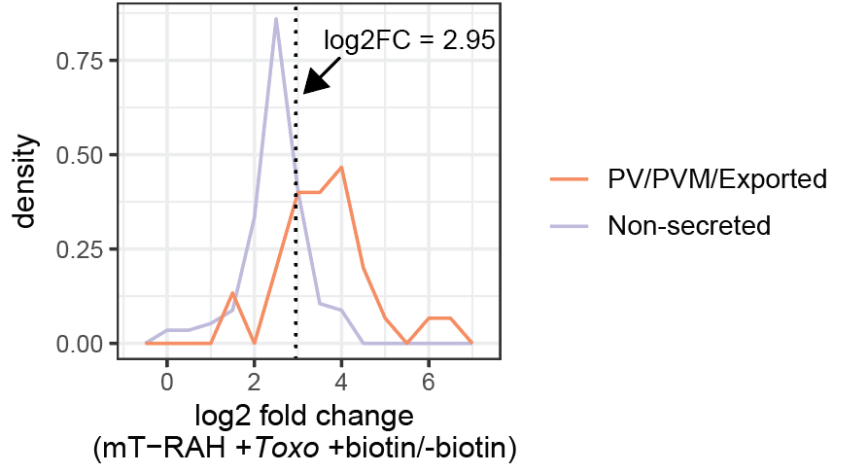**C**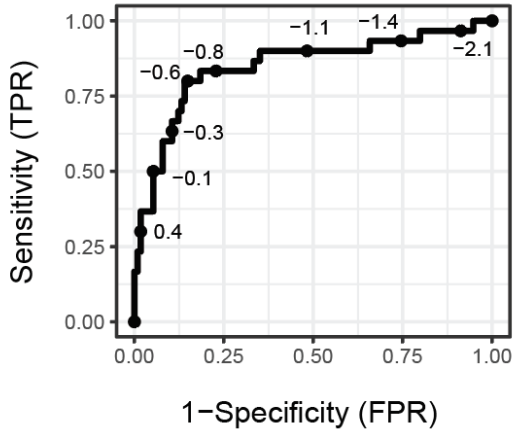**D**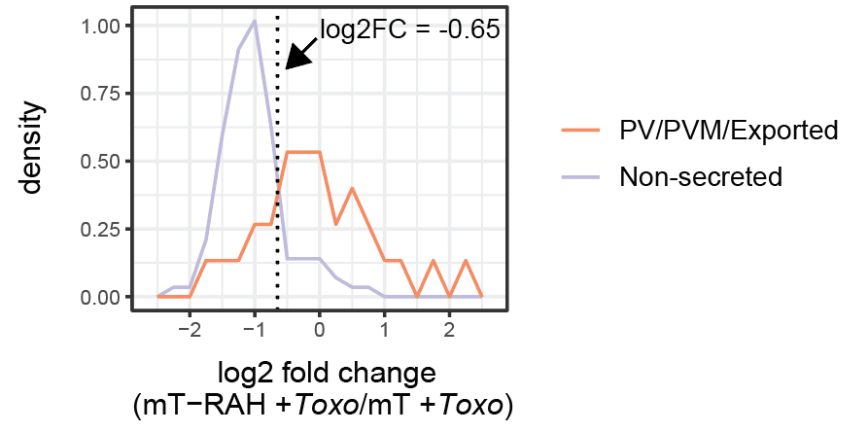

Supplement: mbio.00260-21-sf002.pdf [file mbio.00260-21-sf002.pdf]
